# Supplementary material for: A novel route of enhancing oxidative catalytic activity: hydroxylation of MWCNTs induced by sectional defects
Source: Royal Society of Chemistry journal article supplement (doi:10.1039/c3cy00582h), 2013-11-20
Supplement: c3cy00582h.pdf [file c3cy00582h.pdf]

## Electronic Supplementary Material (ESI)

### A novel route of enhancing oxidative catalytic activity: hydroxylation of MWCNTs induced by sectional defects

Richuan Rao,<sup>a,b</sup> Ming Yang,<sup>a</sup> Qiang Ling,<sup>a</sup> Changshun Li,<sup>a</sup> Qingyun Zhang,<sup>a</sup> Hongxiao Yang,<sup>c</sup> Aimin Zhang,<sup>\*a</sup>

<sup>a</sup>Key Laboratory of Mesoscopic Chemistry, School of Chemistry and Chemical Engineering, Nanjing University, Nanjing 210093, PR China. E-mail: zhangam@nju.edu.cn; Fax: (86)-25-83317761; Tel: (86)-25-83686235

<sup>b</sup> Department of Chemistry and Chemical Engineering, Hefei Normal University, Hefei 230601, PR China.

<sup>c</sup> Analysis and Testing Center, Nanjing Normal University, Nanjing 210046, PR China

15 Table S1: Metal composition of different MWCNTs detected by ICP-AES

---

| Concentration (wt%) | HMWCNTs | HMWCNTs-OH | HMWCNTs-B | HMWCNTs-B-OH |
|---------------------|---------|------------|-----------|--------------|
| Fe                  | 0.00075 | 0.00107    | 0.00572   | 0.00174      |
| Co                  | 0.00313 | 0.00311    | 0.00288   | 0.00286      |
| Na <sup>+</sup>     | None    | None       | None      | None         |

---

None means no detected signal for Na element
